# Supplementary material for: NKp46+ lamina propria natural killer cells undergo metabolic reprogramming in a mouse experimental colitis model
Source: Springer Nature journal article supplement (doi:10.1007/s00011-020-01324-2), 2020-02-10
Supplement: MOESM1 [file 17666066]

| **Gene** | **Forward (5’ to 3’)** | | **Reverse (5’ to 3’)** |
| --- | --- | --- | --- |
| *Actb* | | AGAGGGAAATCGTGCGTGAC | CAATAGTGATGACCTGGCCGT |
| *Hk2* | | TGGGTTTCACCTTCTCGTTC | TTCACCAGGATGAGTCTGAC |
| *Eno1* | | GAATAAAGAAGGCCTGGAGC | TAGACACCACTGGGTAGTCC |
| *Pfk1* | | TGACATGACCATTGGCACAG | TCTTGCTACTCAGGATTCGG |
| *Gapdh* | | AACTTTGGCATTGTGGAAGG | GGATGCAGGGATGATGTTCT |
| *Pgk1* | | CTGTGGTACTGAGAGCAGCAAGA | CAGGACCATTCCAAACAATCTG |
| *Aldoa* | | ACATTGCTGAAGCCCAACAT | ACAGGAAAGTGACCCCAGTG |
| *Pkm2* | | GAAGATCACCCTGGACAACG | ATCTCATCAAACCTGCGGAC |
| *Ldha* | | CTCCAGCAAAGACTACTGTG | TGGGTTAAGAGACTTCAGGG |
| *Gpi1* | | TCCGTGTCCCTTCTCACCAT | TGGCAGTTCCAGACCAGCTT |
| *Aco1* | | AACACCAGCAATCCATCCGT | GGTGACCACTCCACTTCCAG |
| *Cs* | | GAACAGGTGTCTTGGCTCTC | CCTCATGGTCACTATGGATGG |
| *Fh1* | | GACAACTGTGTGGTCGGGAT | CGTTCTTGTGTGCGGTCTTG |
| *Mdh1* | | ATGATGGGTGTTCTGGACG | TCACATTGGCTTTCAGTAGG |
| *Pdha1* | | GACTCAGGGTAGATGGAATGG | CTTACGCTGGATGGGAACAC |
| *Pdhb* | | GGAGGGAATTGAATGTGAGG | CCACAGTCACGAGATGATTTG |
| *Cox1* | | GGGAATTTGTGAATGCCACC | GGGATAAGGTTGGACCGCA |
| *Cox10* | | ACCAGTACGTTATGGCCGC | TGAGGAAGCTCAAGTGCTGG |
| *Nd3* | | AGCCCATCTCGAACTCCTCA | TACGACACACGCGATTCCA |
| *Ndufa1* | | GAGAGGTAAAGCCGGGTCAC | GACCAAGCACACCCCCATAA |
| *Glut1* | | TGTGGTGTCGCTGTTTGTTGT | CCTCGGGTGTCTTGTCACTT |
| *Il22* | | ATCGTCAACCGCACCTTTAT | GACTCCTCGGAACAGTTTCTC |
| *Tnfa* | | GCCTCTTCTCATTCCTGCTTG | CTGATGAGAGGGAGGCCATT |
| *Ifng* | | TTCTTCAGCAACAGCAAGGC | TCAGCAGCGACTCCTTTTCC |

**Supplementary table 1. Primer sequences**

**
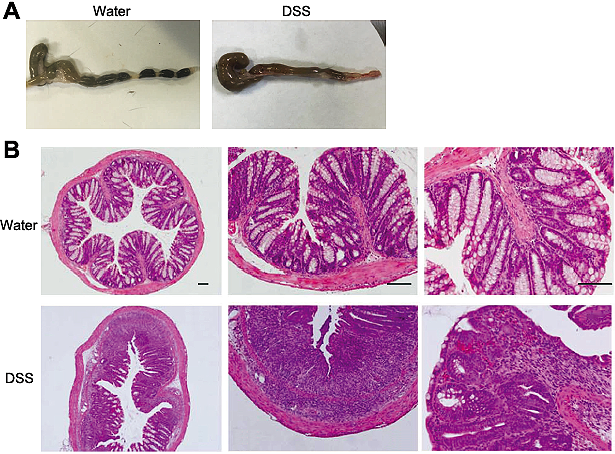
**

**Supplementary Fig 1. The histological change of mouse colons after dextran sulfate sodium (DSS) administration. (A) Representative pictures of mouse colons and cecums.** Mice were orally given water or 3% DSS solution for 7 days. The colon was thickened and showed hyperemia after DSS administration, indicating severe edema and inflammation. **(B) Hematoxylin & Eosin staining of mouse colons after induction of acute colitis**.The colons were fixed in 10% formalin, embedded in paraffin, and cut into 5-µm thick sections.Hematoxylin & Eosin staining was done following the conventional protocol. The colonic membrane structure was disarranged after dextran sulfate sodium administration. Bar length=100 µm.

**
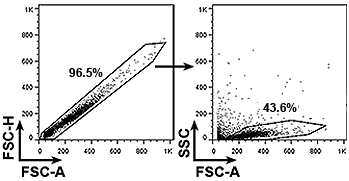
**

**Supplementary Fig 2. The gating strategy for LPLCs**. LPLCs were enriched as described in the “Materials and methods”. Single cells were gated based on FSC-H and FSC-A, and lymphocytes were further gated from single cells.


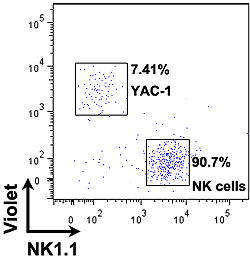


**Supplementary Fig 3. The gating strategy for NK cells and YAC-1 cells after co-culture.** After 4-hour co-culture at the effector-target ratio of 10, NK1.1+ NK cells and CellTraceTM Violet+ YAC-1 cells were distinguished and sorted for further experiments.
